# Supplementary material for: NOTCH1 Intracellular Domain and the Tumor Microenvironment as Prognostic Markers in HNSCC
Source: MDPI journal article supplement (doi:10.3390/cancers14041080), 2022-02-21
Supplement: s1 [file s1]

(a)

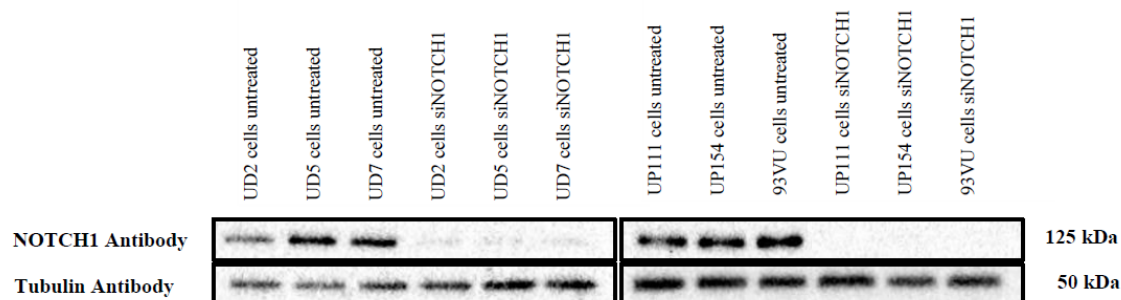

(b)

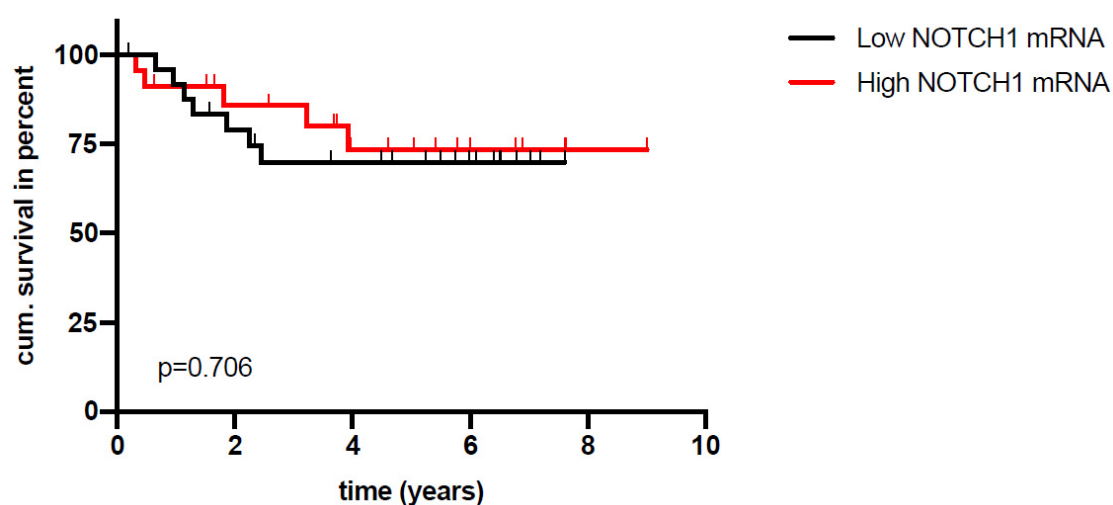

(c)

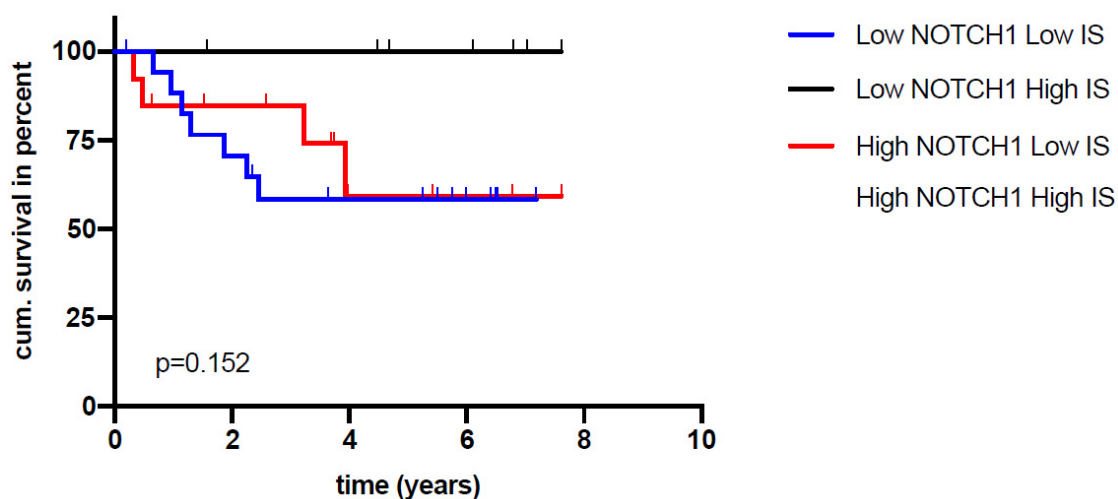

(d)

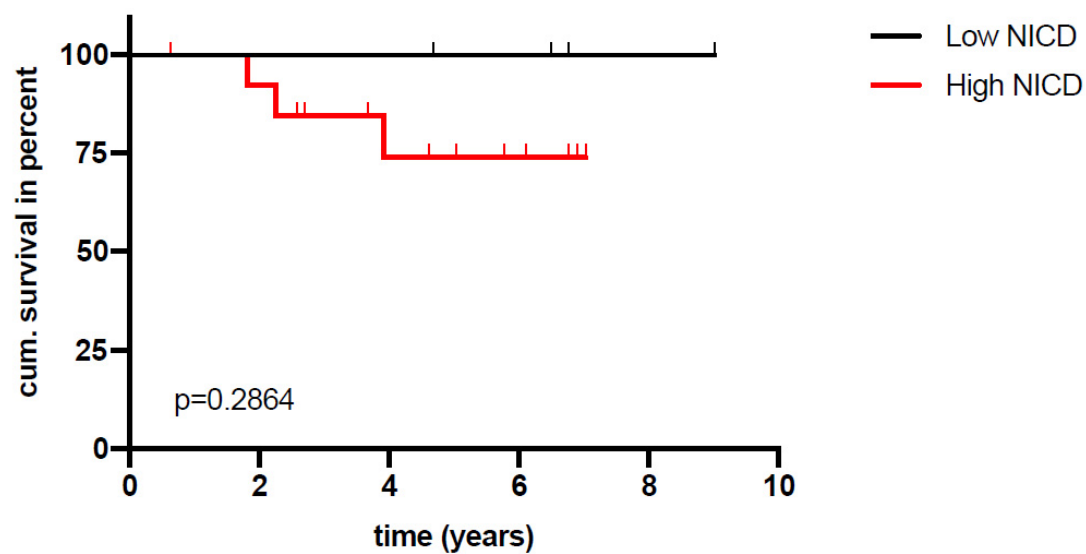

(e)

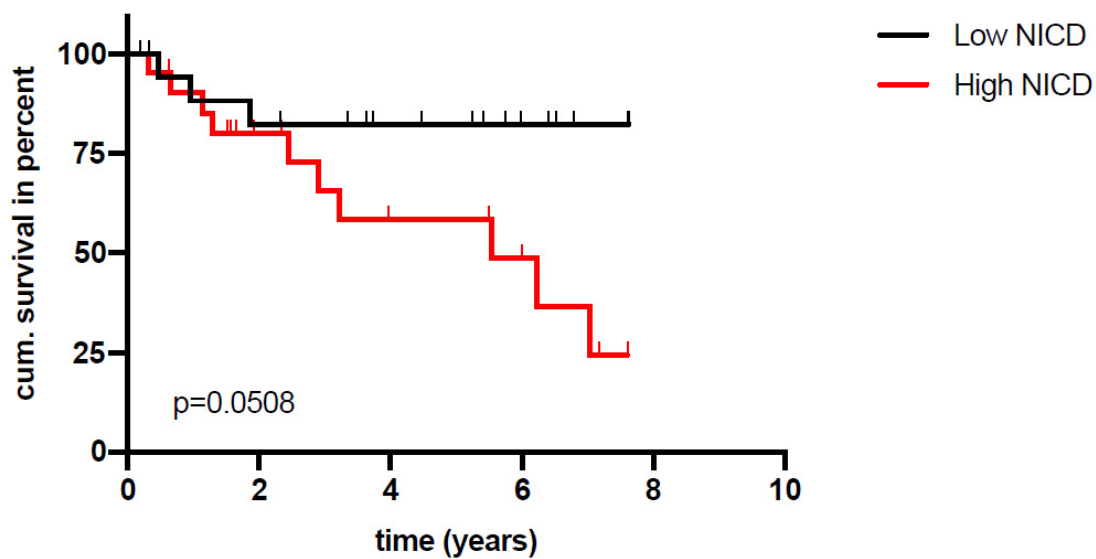

(f)

|                 |      | NOTCH1 mRNA expression |      |          |
|-----------------|------|------------------------|------|----------|
|                 |      | Low                    | High |          |
| NICD Expression | Low  | 16                     | 10   |          |
|                 | High | 14                     | 20   |          |
|                 |      |                        |      | p=0.1923 |

(g)

|     |          | immunoscore |      |          |
|-----|----------|-------------|------|----------|
|     |          | Low         | High |          |
| p16 | Negative | 33          | 11   |          |
|     | Positive | 13          | 13   |          |
|     |          |             |      | p=0.0406 |

(h)

|                                                        | CD3  |     | CD8 |        |
|--------------------------------------------------------|------|-----|-----|--------|
|                                                        | CT   | IM  | CT  | IM     |
| Median number of T lymphocytes per 250 $\mu\text{m}^2$ | 77.5 | 205 | 60  | 136.25 |

(i)

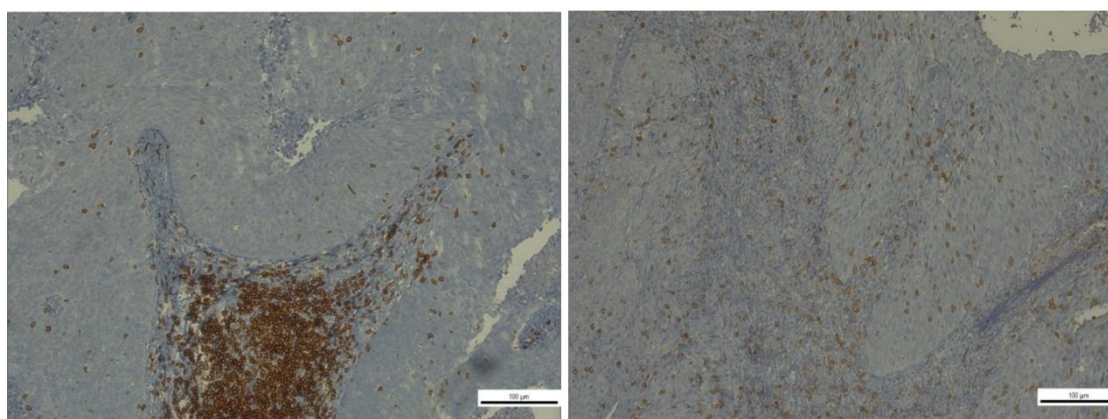

**Figure S1.** (a) Results of the western blots confirming the knockdown of NOTCH1 in the HNSCC cell lines. On the left side are three cell lines before and 48h after treatment with siRNA targeting NOTCH1 (siNOTCH1) depicted. On the right side the other three cell lines and corresponding knockdown are shown. Tubulin was used as a control. The band size of Tubulin was approximately 50 kDa, the band size of NOTCH1 was approximately 125 kDa. (b) OS of OPSCC patients in relation to NOTCH1 mRNA expression (p value (log-rank) =0.706). (c) OS of OPSCC patients in relation to NOTCH1 mRNA expression and the immunoscore (p value (log-rank) =0.152). (d) OS of HPV positive OPSCC patients in relation to NICD expression (p value (log-rank) =0.286). (e) OS of HPV negative OPSCC patients in relation to NICD expression (p value (log-rank) =0.0508). (f) Association of NOTCH1 mRNA expression and NICD expression (Fishers exact test p=0.1923). (g) Association of immunoscore and p16 (Fishers exact test p=0.0406). (h) Median number of T lymphocytes in the areas of the tumor. CT = Core of tumor, IM = Invasive margin. These numbers were used to calculate the immunoscore. (i) Exemplary images of immunohistochemical CD3 (left) and CD8 (right) positive T lymphocytes in OPSCC.

**Table S1.** Detailed Results of (a) migration assay (scratch assay, 9h) and (b) proliferation assay (72h) after siRNA mediated NOTCH1 knockdown, inhibition of NOTCH1 signaling via DAPT and stimulation with DLL4; Depicted are results of all 6 cell lines, the 3 HPV+ cell lines and the 3 HPV- cell lines. Data is depicted as mean  $\pm$  SD. Significance was tested with one-way ANOVA and Dunnet's multiple testing.

(a)

|                             | Ordinary one-way Anova<br>(p value) | Untreated | NOTCH1 KD | p value<br>(Dunnet's) | DAPT  | p value<br>(Dunnet's) | DLL4  | p value<br>(Dunnet's) |
|-----------------------------|-------------------------------------|-----------|-----------|-----------------------|-------|-----------------------|-------|-----------------------|
| UD2                         | 0.0784                              | 1         | 0.341     | 0.0736                | 0.561 | 0.2623                | 0.978 | 0.9994                |
| UD5                         | 0.0241                              | 1         | 0.313     | 0.0179                | 0.416 | 0.0392                | 0.769 | 0.5199                |
| UD7                         | 0.0102                              | 1         | 0.310     | 0.0042                | 0.743 | 0.2660                | 0.776 | 0.3572                |
| UP111                       | 0.0734                              | 1         | 0.528     | 0.0381                | 0.757 | 0.3277                | 0.877 | 0.7691                |
| UP154                       | 0.0303                              | 1         | 0.661     | 0.0148                | 0.921 | 0.6716                | 0.832 | 0.2264                |
| 93VU                        | 0.0098                              | 1         | 0.502     | 0.0314                | 0.901 | 0.8604                | 1.232 | 0.3661                |
| All cell lines<br>(grouped) | <0.0001                             | 1         | 0.443     | <0.0001               | 0.715 | 0.0010                | 0.911 | 0.5011                |
| HPV+ cell lines             | 0.0002                              | 1         | 0.501     | 0.0003                | 0.792 | 0.1706                | 1.014 | 0.9985                |
| HPV- cell lines             | <0.0001                             | 1         | 0.384     | <0.0001               | 0.639 | 0.0019                | 0.806 | 0.1312                |

(b)

|                             | Ordinary one-way Anova<br>(p value) | Untreated | NOTCH1 KD | p value<br>(Dunnet's) | DAPT  | p value<br>(Dunnet's) | DLL4  | p value<br>(Dunnet's) |
|-----------------------------|-------------------------------------|-----------|-----------|-----------------------|-------|-----------------------|-------|-----------------------|
| UD2                         | 0.0985                              | 1         | 0.493     | 0.2066                | 0.826 | 0.8500                | 1.259 | 0.6572                |
| UD5                         | 0.0263                              | 1         | 0.458     | 0.0861                | 1.103 | 0.9317                | 1.271 | 0.4897                |
| UD7                         | 0.1589                              | 1         | 0.101     | 0.1662                | 0.855 | 0.9739                | 1.135 | 0.9786                |
| UP111                       | 0.0004                              | 1         | 0.523     | 0.0059                | 0.581 | 0.0124                | 1.245 | 0.1407                |
| UP154                       | 0.2231                              | 1         | 0.509     | 0.1818                | 0.919 | 0.9761                | 0.989 | >0.9999               |
| 93VU                        | 0.1295                              | 1         | 0.308     | 0.0931                | 0.784 | 0.7869                | 0.958 | 0.9974                |
| All cell lines<br>(grouped) | <0.0001                             | 1         | 0.398     | <0.0001               | 0.845 | 0.3175                | 1.143 | 0.3828                |
| HPV+ cell lines             | 0.0003                              | 1         | 0.435     | 0.0009                | 0.843 | 0.5445                | 1.069 | 0.9266                |
| HPV- cell lines             | <0.0001                             | 1         | 0.360     | 0.0011                | 0.846 | 0.7193                | 1.217 | 0.4609                |
